# Supplementary material for: Genes Involved in Energy Metabolism Are Differentially Expressed During the Day–Night Cycle in Murine Retinal Pigment Epithelium
Source: PubMed Central journal article supplement — Invest Ophthalmol Vis Sci. 2020 May 27;61(5):49. doi: 10.1167/iovs.61.5.49 (PMC7405837; doi:10.1167/iovs.61.5.49), 2020-05-27
Supplement: iovs-61-5-49_s001.pdf [file iovs-61-5-49_s001.pdf]

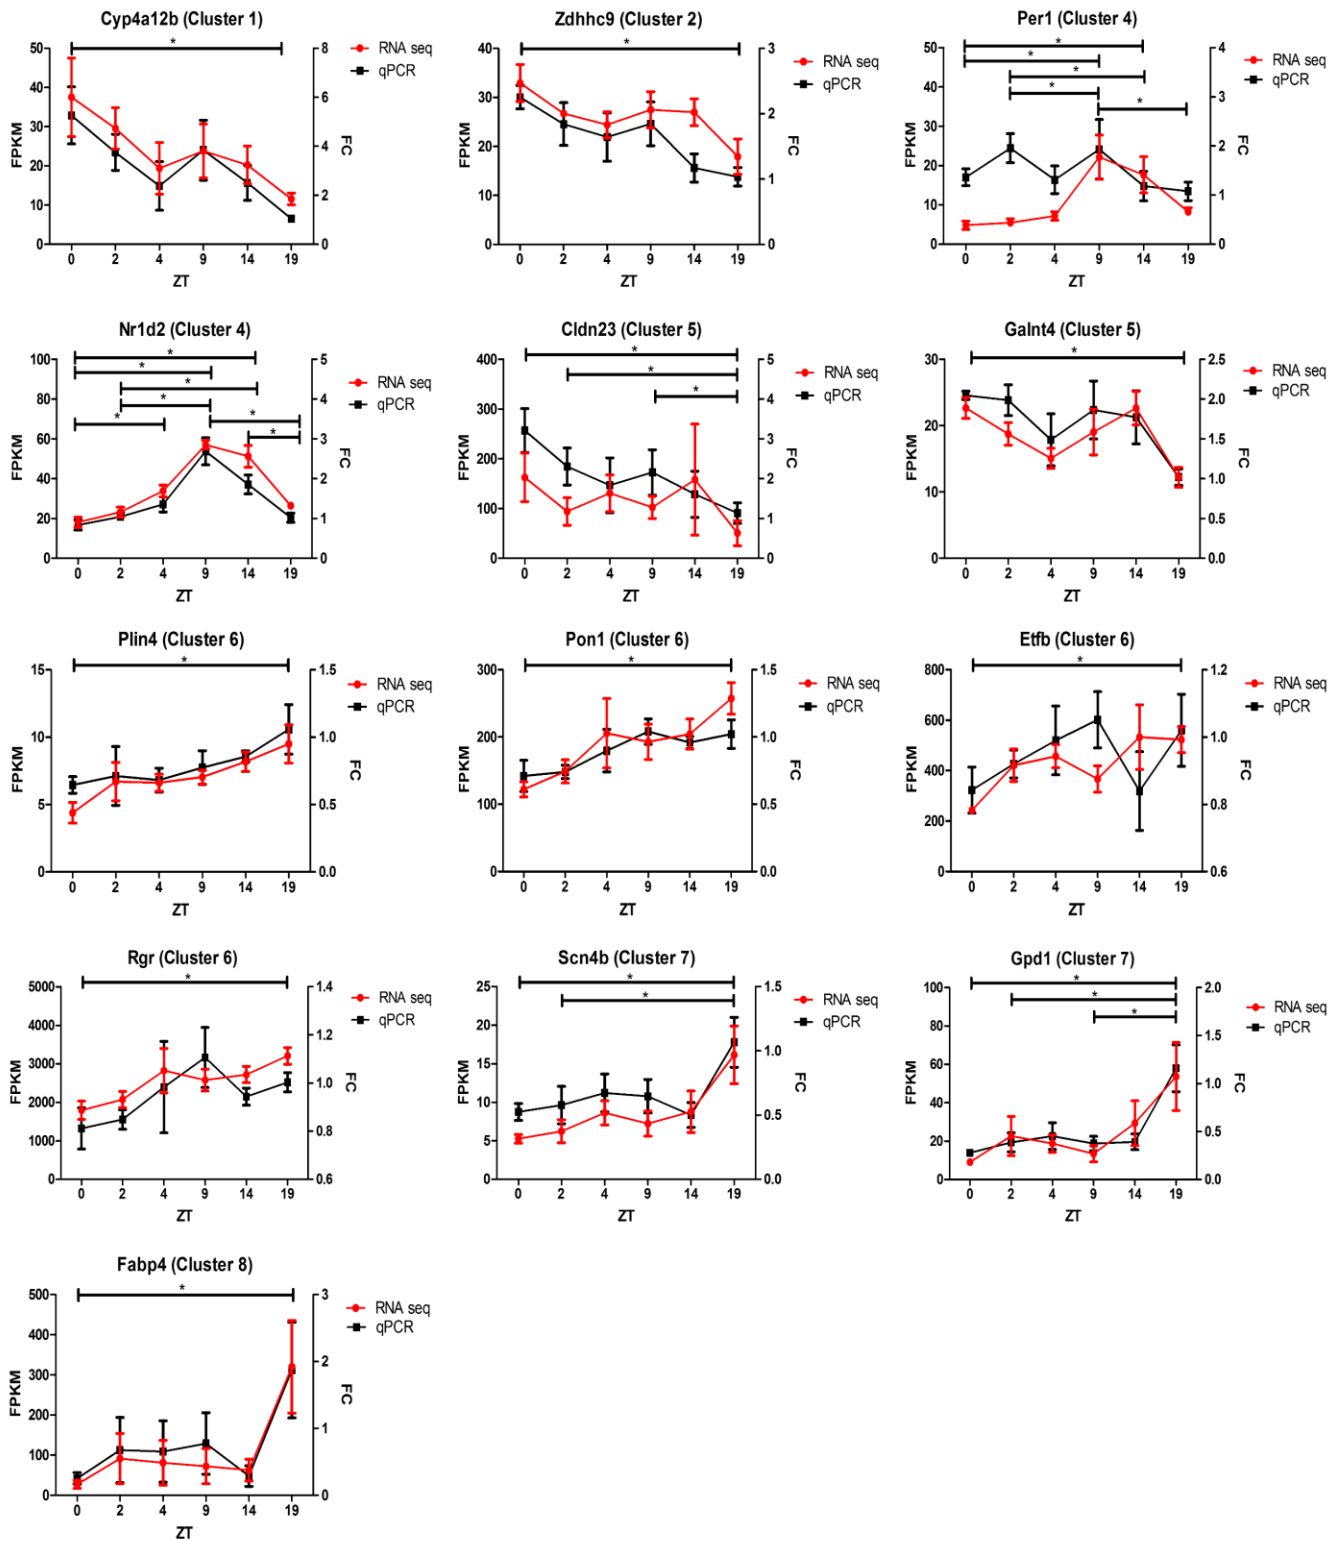

**Figure S1. Validation of RNA-seq data using quantitative RT-PCR analyses.** To check the validity of our RNA-seq data, 13 differentially expressed genes were selected derived

representing 7 of the 8 identified clusters and subsequently analyzed using qRT-PCR. *Gusb* expression was used as housekeeping gene. Relative expression levels (fold change, FC) were compared with RNA-sequencing data (fragments per kilobase mapped, FPKM). \*,  $P < 0.05$  by RNA-seq analysis.
