# Supplementary material for: Genes Involved in Energy Metabolism Are Differentially Expressed During the Day–Night Cycle in Murine Retinal Pigment Epithelium
Source: PubMed Central journal article supplement — Invest Ophthalmol Vis Sci. 2020 May 27;61(5):49. doi: 10.1167/iovs.61.5.49 (PMC7405837; doi:10.1167/iovs.61.5.49), 2020-05-27
Supplement: iovs-61-5-49_s002.pdf [file iovs-61-5-49_s002.pdf]

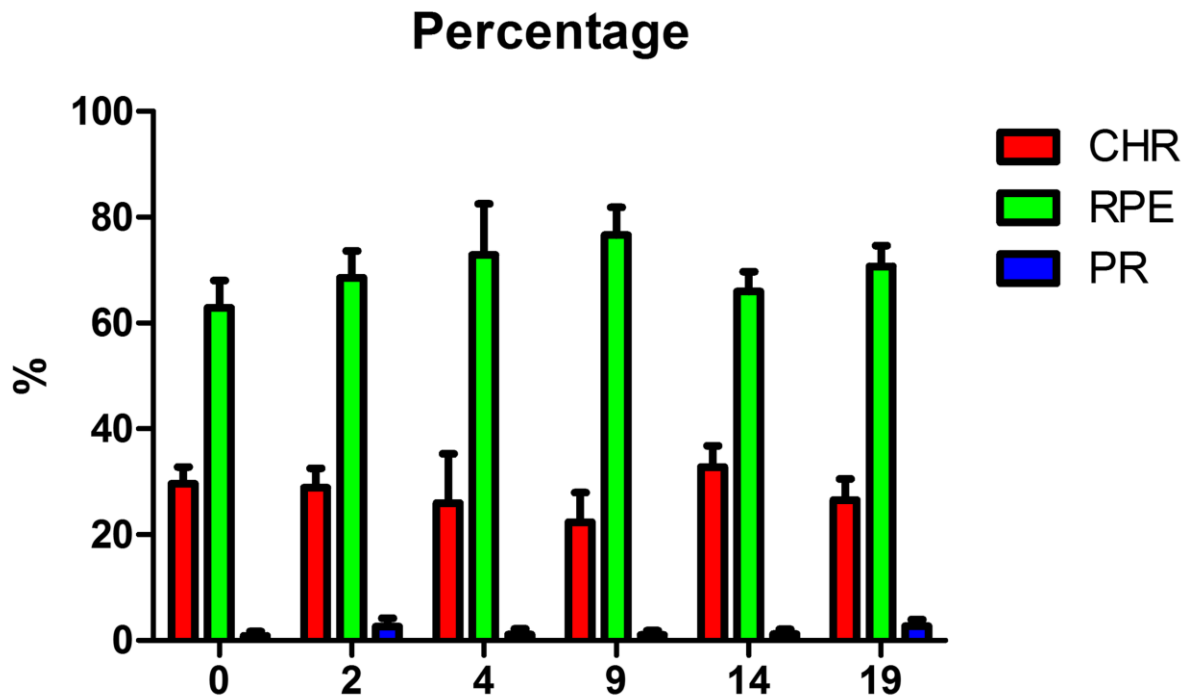

**Figure S2. RNA-seq sample composition.** Our datasets were compared with other datasets specifically for choroid, RPE and PR cells. The amount of overlap between these datasets and our samples is indicated in percentages. Choriocapillaris (CHR; red), retinal pigment epithelium (RPE; green) and photoreceptor cells (PR; blue) are indicated.
