# Supplementary material for: Genes Involved in Energy Metabolism Are Differentially Expressed During the Day–Night Cycle in Murine Retinal Pigment Epithelium
Source: PubMed Central journal article supplement — Invest Ophthalmol Vis Sci. 2020 May 27;61(5):49. doi: 10.1167/iovs.61.5.49 (PMC7405837; doi:10.1167/iovs.61.5.49), 2020-05-27
Supplement: iovs-61-5-49_s003.pdf [file iovs-61-5-49_s003.pdf]

**Table S1. Quality check RNA sample and RNA-sequencing reads.**

| Sample ID | Concentration Fragment Analyzer (ng/ul) | Integrity before sequencing (RQN) | % $\geq$ Q30 |
|-----------|-----------------------------------------|-----------------------------------|--------------|
| 818R_2h   | 25.89                                   | 8.90                              | 88.91        |
| 819L_11h  | 61.43                                   | 8.70                              | 88.71        |
| 820R_9h   | 122.13                                  | 8.80                              | 88.95        |
| 821R_16h  | 26.23                                   | 9.10                              | 89.17        |
| 822L_2h   | 19.94                                   | 8.10                              | 88.76        |
| 823R_16h  | 102.42                                  | 8.80                              | 88.54        |
| 824L_21h  | 45.01                                   | 9.30                              | 88.53        |
| 825L_7h   | 106.51                                  | 9.40                              | 88.54        |
| 830L_9h   | 91.26                                   | 8.70                              | 88.68        |
| 831L_11h  | 53.91                                   | 8.60                              | 88.78        |
| 832L_21h  | 34.11                                   | 9.10                              | 88.79        |
| 836R_9h   | 31.74                                   | 9.00                              | 88.63        |
| 837R_2h   | 11.74                                   | 8.70                              | 89.27        |
| 838R_9h   | 52.12                                   | 8.70                              | 88.38        |
| 839R_7h   | 70.59                                   | 9.10                              | 88.65        |
| 840L_7h   | 113.40                                  | 9.10                              | 88.59        |
| 841L_11h  | 21.68                                   | 9.10                              | 88.91        |
| 842L_11h  | 12.38                                   | 9.50                              | 88.97        |
| 843L_16h  | 79.09                                   | 9.60                              | 88.92        |
| 844L_16h  | 88.29                                   | 9.00                              | 88.92        |
| 845R_21h  | 3.33                                    | 8.20                              | 89.98        |
| 861R_7h   | 6.95                                    | 8.40                              | 88.72        |
| 862L_11h  | 84.59                                   | 9.00                              | 88.55        |
| 863L_7h   | 42.72                                   | 9.20                              | 88.92        |
| 870R_2h   | 52.81                                   | 9.30                              | 89.12        |
| 871R_9h   | 47.83                                   | 9.30                              | 89.01        |
| 882R_16h  | 58.13                                   | 8.00                              | 89.14        |
| 883L_21h  | 60.93                                   | 8.70                              | 88.96        |
| 888L_21h  | 7.05                                    | 8.30                              | 88.84        |
| 889R_2h   | 17.97                                   | 9.30                              | 88.66        |

RNA concentration and quality. RNA quality number (RQN) ranges from 10 (intact) to 1 (highly degraded). Q30 indicates the percentage of reads which have a base call accuracy of 99.9 %.
