# Supplementary material for: Genes Involved in Energy Metabolism Are Differentially Expressed During the Day–Night Cycle in Murine Retinal Pigment Epithelium
Source: PubMed Central journal article supplement — Invest Ophthalmol Vis Sci. 2020 May 27;61(5):49. doi: 10.1167/iovs.61.5.49 (PMC7405837; doi:10.1167/iovs.61.5.49), 2020-05-27
Supplement: iovs-61-5-49_s004.pdf [file iovs-61-5-49_s004.pdf]

**Table S2. Primer sequences used for QPCR validation of our dataset.**

| <b>Gene</b>     | <b>Primer</b>                    | <b>Sequence<br/>(5'-3')</b>                        | <b>P-value</b> | <b>Cluster</b> |
|-----------------|----------------------------------|----------------------------------------------------|----------------|----------------|
| <b>Cyp4a12b</b> | Forward primer<br>Reverse primer | GAGTGTCTCTAATGGCTGCTT<br>CCTTGATTTGATCACTTGGTCTGTG | 0.018          | 1              |
| <b>Zdhhc9</b>   | Forward primer<br>Reverse primer | GAAGTCGCTACCACCTCTGG<br>AAGAGCCCTGAACAAGGGAC       | 0.013          | 2              |
| <b>Fabp4</b>    | Forward primer<br>Reverse primer | TGAAATCACCGCAGACGACA<br>ACACATTCCACCACCAGCTT       | 0.017          | 8              |
| <b>Per1</b>     | Forward primer<br>Reverse primer | AGAGTCCCAGACCAGGTGTC<br>GGAGGACGAAACAGGGAAGG       | 0.00061        | 4              |
| <b>Nr1d2</b>    | Forward primer<br>Reverse primer | GGGATGTCACGAGATGCTGT<br>AGGTGTCATTCTGCAGGTGG       | 9,59E-<br>13   | 4              |
| <b>Cldn23</b>   | Forward primer<br>Reverse primer | CAAGATGAGCCCCACTACGG<br>TACCAGGAGACCGGGATGAG       | 0.00095        | 5              |
| <b>Galnt4</b>   | Forward primer<br>Reverse primer | CCATGGCAGGAGGACTGTTT<br>TTTTCGCCTCCCCAGACTTC       | 0.014          | 5              |
| <b>Plin4</b>    | Forward primer<br>Reverse primer | TCAGTGGAGGAGTGTGGTCA<br>CCAGCTGAGCTTGTTCTCA        | 0.013          | 6              |
| <b>Pon1</b>     | Forward primer<br>Reverse primer | ACAGGGGACCTCTGGGTG<br>TTCTGGATTCTGAAGCACCTCTG      | 0.017          | 6              |
| <b>Etfb</b>     | Forward primer<br>Reverse primer | CACAGTGCCAGGAGACCATC<br>GGCCTAAGCTTTCTGCCTGT       | 0.018          | 6              |
| <b>Scn4b</b>    | Forward primer<br>Reverse primer | TAACGGCTCATCGATCCTGC<br>CCCGTTCGATGAGAATCCTGG      | 0.010          | 7              |
| <b>Gpd1</b>     | Forward primer<br>Reverse primer | TGCTCGAACTGGAAAGTCCAT<br>GCCCTTGTGTTGGAGAATGC      | 0.00019        | 7              |
| <b>Gusb</b>     | Forward primer<br>Reverse primer | GCAGTTGTGTGGGTGAATGG<br>CACTCTGGACCAGCTTGCTA       |                |                |

Selected genes for RT-qPCR validation and their primer sequences. Exact p-value and gene expression cluster are indicated.
