# Supplementary material for: Genes Involved in Energy Metabolism Are Differentially Expressed During the Day–Night Cycle in Murine Retinal Pigment Epithelium
Source: PubMed Central journal article supplement — Invest Ophthalmol Vis Sci. 2020 May 27;61(5):49. doi: 10.1167/iovs.61.5.49 (PMC7405837; doi:10.1167/iovs.61.5.49), 2020-05-27
Supplement: iovs-61-5-49_s005.pdf [file iovs-61-5-49_s005.pdf]

**Table S4. Significant pathway enrichment using KEGG pathway analysis.**

| <b>KEGG pathway</b>                                               | <b># DEGs</b> | <b>Adjusted p-value (P&lt;0.01)</b> |
|-------------------------------------------------------------------|---------------|-------------------------------------|
| Tight junction (mmu04530)                                         | 23            | 0.000017                            |
| Adherens junction (mmu04520)                                      | 15            | 0.000114                            |
| Alzheimer's disease (mmu05010)                                    | 24            | 0.000160                            |
| Parkinson's disease (mmu05012)                                    | 21            | 0.000241                            |
| Oxidative phosphorylation (mmu00190)                              | 19            | 0.000695                            |
| Metabolic pathways (mmu01100)                                     | 84            | 0.000764                            |
| Cardiac muscle contraction (mmu04260)                             | 14            | 0.000827                            |
| Circadian rhythm (mmu04710)                                       | 9             | 0.000948                            |
| Arrhythmogenic right ventricular cardiomyopathy (ARVC) (mmu05412) | 13            | 0.000960                            |
| Leukocyte transendothelial migration (mmu04670)                   | 16            | 0.003936                            |
| Non-alcoholic fatty liver disease (NAFLD) (mmu04932)              | 18            | 0.007027                            |
| Hypertrophic cardiomyopathy (HCM) (mmu05410)                      | 12            | 0.008936                            |

The number of differentially expressed genes (DEGs) found in our dataset which overlap with the reference pathways and p-values are indicated. P-values indicate the significance of enrichment and were benjamini corrected.
